# Supplementary material
Source: MDPI journal article supplement (https://www.mdpi.com/2073-4441/14/12/1950)
Supplement: s1 [file s1]

Table S1. The comparison of evaluation statistics for ERA5 and ERA-Interim precipitation in three time periods.

| <b>Time period</b> | <b>Dataset</b> | <b>CC</b> | <b>SD (mm/yr)</b> | <b>NSD</b> | <b>RMSE (mm/yr)</b> | <b>Mean (mm/yr)</b> |
|--------------------|----------------|-----------|-------------------|------------|---------------------|---------------------|
| 1986-2016          | Observed       | 1         | 82                | 1          | 0                   | 377                 |
|                    | ERA5           | 0.8       | 71                | 0.9        | 99                  | 459                 |
|                    | ERA-Interim    | 0.8       | 100               | 1.2        | 167                 | 532                 |
| 1986-2006          | Observed       | 1         | 90                | 1          | 0                   | 388                 |
|                    | ERA5           | 0.8       | 83                | 0.9        | 89                  | 461                 |
|                    | ERA-Interim    | 0.9       | 110               | 1.2        | 147                 | 526                 |
| 2006-2016          | Observed       | 1         | 63                | 1          | 0                   | 356                 |
|                    | ERA5           | 0.5       | 46                | 0.7        | 114                 | 456                 |
|                    | ERA-Interim    | 0.5       | 80                | 1.3        | 199                 | 542                 |

Table S2. The comparison of evaluation statistics for ERA5 and ERA-Interim temperature in three time periods.

| <b>Time period</b> | <b>Dataset</b> | <b>CC</b> | <b>SD (°C)</b> | <b>NSD</b> | <b>RMSE (°C)</b> | <b>Mean (°C)</b> |
|--------------------|----------------|-----------|----------------|------------|------------------|------------------|
| 1986-2016          | Observed       | 1         | 0.8            | 1          | 0                | 12               |
|                    | ERA5           | 0.7       | 0.9            | 1.1        | 0.9              | 12.6             |
|                    | ERA-Interim    | 0.8       | 0.9            | 1.1        | 0.9              | 12.6             |
| 1986-2006          | Observed       | 1         | 0.8            | 1          | 0                | 11.8             |
|                    | ERA5           | 0.7       | 0.9            | 1          | 0.9              | 12.3             |
|                    | ERA-Interim    | 0.7       | 0.9            | 1.1        | 0.8              | 12.2             |
| 2006-2016          | Observed       | 1         | 0.7            | 1          | 0                | 12.3             |
|                    | ERA5           | 0.9       | 0.6            | 0.9        | 0.9              | 13.2             |
|                    | ERA-Interim    | 0.9       | 0.6            | 0.9        | 0.9              | 13.2             |

Table S3. Calculated statistics between GlobWat estimated and observed discharge in three time periods.

| Time Period | Dataset     | Eref Metod | CC  | SD (mm/yr) | NSD | RMSE (mm/yr) | NSE  | Mean (mm/yr) |
|-------------|-------------|------------|-----|------------|-----|--------------|------|--------------|
| 1986-2016   | Observed    |            | 1   | 73         | 1   | 0            | 1    | 105          |
|             |             | De Bruin   | 0.7 | 66         | 0.9 | 56           | 0.3  | 126          |
|             |             | ERA5 Eref  | 0.8 | 81         | 1.1 | 83           | 0.0  | 167          |
|             | ERA-Interim | Langbein   | 0.7 | 82         | 1.1 | 100          | -0.5 | 187          |
|             |             | De Bruin   | 0.7 | 105        | 1.4 | 119          | -0.3 | 200          |
|             |             | Langbein   | 0.7 | 118        | 1.6 | 184          | -1.4 | 271          |
| 1986-2006   | Observed    |            | 1   | 73         | 1   | 0            | 1    | 137          |
|             |             | De Bruin   | 0.8 | 66         | 0.9 | 51           | 0.5  | 140          |
|             |             | ERA5 Eref  | 0.8 | 81         | 1.1 | 75           | 0.3  | 186          |
|             | ERA-Interim | Langbein   | 0.8 | 82         | 1.1 | 89           | 0    | 205          |
|             |             | De Bruin   | 0.8 | 105        | 1.4 | 102          | 0.2  | 213          |
|             |             | Langbein   | 0.9 | 118        | 1.6 | 168          | -0.8 | 288          |
| 2006-2016   | Observed    |            | 1   | 25         | 1   | 0            | 1    | 58           |
|             |             | De Bruin   | 0.4 | 34         | 1.4 | 65           | -2.7 | 114          |
|             |             | ERA5 Eref  | 0.3 | 39         | 1.6 | 98           | -5.2 | 147          |
|             | ERA-Interim | Langbein   | 0.3 | 90         | 3.6 | 120          | -7.7 | 171          |
|             |             | De Bruin   | 0.3 | 62         | 2.5 | 149          | -4.8 | 194          |
|             |             | Langbein   | 0.3 | 72         | 2.9 | 217          | -8   | 263          |

Table S4. Major Dams of Urmia Lake Basin [1].

| Dam               | Sub-basin   | River       | Regulated Volume (MCM) | Year of completion |
|-------------------|-------------|-------------|------------------------|--------------------|
| Bukan             | Zarineh Rud | Zarineh Rud | 285                    | 2006               |
| Shahid Madani     | Aji Chai    | Aji Chai    | 300                    | 2005               |
| Qalae             | Sufi Chai   | Qalae Chai  | 53.4                   | 2006               |
| Zola              | Zola Chai   | Zola Chai   | 132.5                  | 2006               |
| Gogerdchi (Saroq) | Zarineh Rud | Saroq       | 42                     | 2007               |
| Cheragh Vays      | Zarineh Rud | Saqez Chai  | 74.86                  | 2007               |
| Chirabad          | Gudar Chai  | Kani rash   | 255.6                  | 2007               |
| Shakaryazi        | Derk Chai   | Derk Chai   | 31                     | 2008               |
| Nazlo             | Nazlo Chai  | Nazlo       | 273                    | 2009               |
| Semineh Rud       | Semineh Rud | Semineh Rud | 269                    | N.A.               |
| Ajorlo            | Zarineh Rud | Ajorlo      | 105.7                  | N.A.               |

## References

1. Hashemi, M. An Independent Review : The Status of Water Resources in the Lake Urmia Basin; Conservation of Iranian Wetlands Project: Tehran, Iran, 2008.
